# Supplementary material for: Light actuated single-chain magnet with magnetic coercivity
Source: Royal Society of Chemistry journal article supplement (doi:10.1039/d2qi01371a), 2022-01-01
Supplement: d2qi01371a1.pdf [file d2qi01371a1.pdf]

## Supporting Information

### Light Actuated Single-Chain Magnet with Magnetic Coercivity

Qiang Liu,<sup>a</sup> Nian-Tao Yao,<sup>a</sup> Hui-Ying Sun,<sup>a</sup> Ji-Xiang Hu,<sup>b</sup> Yin-Shan Meng<sup>\*a</sup> and Tao Liu<sup>a</sup>

<sup>a</sup>*State Key Laboratory of Fine Chemicals, Dalian University of Technology, Dalian, 116024, China*

<sup>b</sup>*College of Chemistry and Chemical Engineering, Qingdao University, Qingdao, 266071, China*

\*Corresponding authors. Email: mengys@dlut.edu.cn

## CONTENTS

|                                                                                                                                                                                                                                                |    |
|------------------------------------------------------------------------------------------------------------------------------------------------------------------------------------------------------------------------------------------------|----|
| <b>Table S1:</b> Crystal data and structure refinements for compound <b>1</b> .....                                                                                                                                                            | 1  |
| <b>Table S2:</b> Crystal data and structure refinements for compound <b>2</b> .....                                                                                                                                                            | 2  |
| <b>Table S3:</b> Selected <b>distances</b> (Å) and <b>angles</b> (°) for <b>1</b> at different temperature .....                                                                                                                               | 3  |
| <b>Table S4:</b> Selected <b>distances</b> (Å) and <b>angles</b> (°) for <b>2</b> at different temperature .....                                                                                                                               | 5  |
| <b>Table S5:</b> Temperature-dependent $^{57}\text{Fe}$ Mössbauer Parameters for <b>1</b> and <b>2</b> .....                                                                                                                                   | 6  |
| <b>Table S6:</b> Selected bond lengths (Å) in compounds <b>1</b> and <b>2</b> .....                                                                                                                                                            | 7  |
| <b>Table S7:</b> Comparison of energy barrier data in photo-induced [FeCo]-based nanomagnets .....                                                                                                                                             | 8  |
| <b>Table S8:</b> Selected angles (°) in compounds <b>1</b> and <b>2</b> .....                                                                                                                                                                  | 9  |
| <b>Fig. S1:</b> X-ray powder diffraction data for compounds <b>1</b> (a) and <b>2</b> (b) at 300 K. ....                                                                                                                                       | 10 |
| <b>Fig. S2:</b> Packing diagrams of <b>1</b> (a) and <b>2</b> (b) along <i>a</i> axis .....                                                                                                                                                    | 11 |
| <b>Fig. S3:</b> Packing diagrams of <b>1</b> (a) and <b>2</b> (b) along <i>b</i> axis .....                                                                                                                                                    | 12 |
| <b>Fig. S4:</b> Packing diagrams of <b>1</b> (a) and <b>2</b> (b) along <i>c</i> axis .....                                                                                                                                                    | 13 |
| <b>Fig. S5:</b> IR spectra of <b>1</b> (a) and <b>2</b> (b) at 300 K .....                                                                                                                                                                     | 14 |
| <b>Fig. S6:</b> Temperature-dependent infrared spectra in heating mode for compounds <b>1</b> and <b>2</b> .....                                                                                                                               | 15 |
| <b>Fig. S7:</b> Hydrogen bonds formed between lattice water molecules and terminal cyanide nitrogen atoms for <b>1</b> at 273 K (a) and <b>2</b> at 230 K (b), respectively .....                                                              | 16 |
| <b>Fig. S8:</b> $\pi\cdots\pi$ distances formed between ligand <b>L</b> and cyanometallate building blocks for <b>1</b> (a) and <b>2</b> (b) at LT and HT phases, respectively .....                                                           | 17 |
| <b>Fig. S9:</b> Temperature-dependence dielectric loss ( $\epsilon''$ ) signals of compounds <b>1</b> and <b>2</b> with different frequencies .....                                                                                            | 18 |
| <b>Fig. S10:</b> Variable temperature solid state UV-Vis-NIR spectra for compounds <b>1</b> and <b>2</b> .....                                                                                                                                 | 19 |
| <b>Fig. S11:</b> $\chi T$ vs time plots of <b>1</b> under successive 946-nm light irradiation at 10 K .....                                                                                                                                    | 20 |
| <b>Fig. S12:</b> $\chi T$ vs time plots of <b>2</b> under successive 946-nm light irradiation at 10 K .....                                                                                                                                    | 21 |
| <b>Fig. S13:</b> Temperature dependence of in-phase ( $\chi'$ ) and out-of-phase ( $\chi''$ ) signals for <b>1</b> before irradiation under zero DC field and 3.5 Oe AC field .....                                                            | 22 |
| <b>Fig. S14:</b> $\ln(2\pi\nu)$ vs. $T^{-1}$ plots for <b>1</b> after 946-nm light irradiation .....                                                                                                                                           | 23 |
| <b>Fig. S15:</b> (a) Temperature dependence of the in-phase of ac magnetic susceptibility of <b>1</b> after 946-nm irradiation under zero DC field at 1 Hz. (b) Plot of $\ln(\chi' T)$ vs $T^{-1}$ for <b>1</b> after 946-nm irradiation ..... | 24 |
| <b>Fig. S16:</b> Zero-field-cooling and field-cooling susceptibility measurement for <b>1</b> under 50 Oe DC field after 946-nm light irradiation .....                                                                                        | 25 |
| <b>Fig. S17:</b> Temperature dependence of in-phase ( $\chi'$ ) and out-of-phase ( $\chi''$ ) signals for <b>2</b> after irradiation under zero DC field and 3.5 Oe AC field .....                                                             | 26 |
| <b>Fig. S18:</b> Susceptibility measurements of compound <b>2</b> under different dc fields after light irradiation .....                                                                                                                      | 27 |
| <b>Fig. S19:</b> View of twisted iron cores present in <b>1</b> (a) and <b>2</b> (b) along the pseudo- <i>C</i> <sub>3</sub> axes (along the B $\cdots$ Fe vectors) .....                                                                      | 28 |

**Table S1.** Crystal data and structure refinements for compound **1**.

| T (K)                                     | 273                              | 110                              |
|-------------------------------------------|----------------------------------|----------------------------------|
| Formula                                   | $C_{36}H_{29}B_2CoFe_2N_{28}O_4$ | $C_{36}H_{29}B_2CoFe_2N_{28}O_4$ |
| CCDC                                      | 2160263                          | 2160264                          |
| Fw                                        | 1110.12                          | 1110.12                          |
| Crystal system                            | Triclinic                        | Triclinic                        |
| Space group                               | $P\bar{1}$                       | $P\bar{1}$                       |
| $a$ (Å)                                   | 12.1414(15)                      | 11.714(3)                        |
| $b$ (Å)                                   | 14.1379(17)                      | 13.736(3)                        |
| $c$ (Å)                                   | 14.5464(17)                      | 14.694(3)                        |
| $\alpha$ (°)                              | 84.704(4)                        | 87.693(8)                        |
| $\beta$ (°)                               | 81.780(4)                        | 80.355(7)                        |
| $\gamma$ (°)                              | 87.586(4)                        | 89.333(7)                        |
| $V$ (Å <sup>3</sup> )                     | 2459.7(5)                        | 2329.1(9)                        |
| $Z$                                       | 1                                | 1                                |
| $\rho_{\text{calc}}$ (g/cm <sup>3</sup> ) | 1.499                            | 1.583                            |
| $F(000)$                                  | 1124.0                           | 1124.0                           |
| Reflections collected                     | 38448                            | 41701                            |
| Unique reflections ( $R_{\text{int}}$ )   | 0.0962                           | 0.0801                           |
| Goodness-of-fit on $F^2$                  | 1.133                            | 1.213                            |
| $R_I$ , [ $I \geq 2\sigma(I)$ ]           | 0.1404                           | 0.1220                           |
| $wR_2$ , [ $I \geq 2\sigma(I)$ ]          | 0.2996                           | 0.2582                           |

$$R_I = \Sigma||F_o| - |F_c|| / \Sigma|F_o|; wR_2 = \{\Sigma[w(F_o^2 - F_c^2)^2] / \Sigma[w(F_o^2)^2]\}^{1/2}.$$

**Table S2.** Crystal data and structure refinements for compound **2**.

| T (K)                                                       | 230                                                                                             | 150                                                                                             |
|-------------------------------------------------------------|-------------------------------------------------------------------------------------------------|-------------------------------------------------------------------------------------------------|
| Formula                                                     | C <sub>30</sub> H <sub>26</sub> B <sub>2</sub> CoFe <sub>2</sub> N <sub>24</sub> O <sub>4</sub> | C <sub>30</sub> H <sub>26</sub> B <sub>2</sub> CoFe <sub>2</sub> N <sub>24</sub> O <sub>4</sub> |
| CCDC                                                        | 2160261                                                                                         | 2160262                                                                                         |
| Fw                                                          | 979.00                                                                                          | 979.00                                                                                          |
| Crystal system                                              | Monoclinic                                                                                      | Monoclinic                                                                                      |
| Space group                                                 | <i>P</i> 2 <sub>1</sub> / <i>n</i>                                                              | <i>P</i> 2 <sub>1</sub> / <i>n</i>                                                              |
| <i>a</i> (Å)                                                | 12.0759(11)                                                                                     | 11.7234(6)                                                                                      |
| <i>b</i> (Å)                                                | 14.0951(13)                                                                                     | 13.8376(8)                                                                                      |
| <i>c</i> (Å)                                                | 28.122(3)                                                                                       | 27.9557(17)                                                                                     |
| $\alpha$ (°)                                                | 90                                                                                              | 90                                                                                              |
| $\beta$ (°)                                                 | 90.258(3)                                                                                       | 91.839(2)                                                                                       |
| $\gamma$ (°)                                                | 90                                                                                              | 90                                                                                              |
| <i>V</i> (Å <sup>3</sup> )                                  | 4786.6(8)                                                                                       | 4532.7(4)                                                                                       |
| <i>Z</i>                                                    | 4                                                                                               | 4                                                                                               |
| $\rho_{\text{calc}}$ (g/cm <sup>3</sup> )                   | 1.358                                                                                           | 1.515                                                                                           |
| <i>F</i> (000)                                              | 1980.0                                                                                          | 2088.0                                                                                          |
| Reflections collected                                       | 38837                                                                                           | 37680                                                                                           |
| Unique reflections ( <i>R</i> <sub>int</sub> )              | 0.0735                                                                                          | 0.0515                                                                                          |
| Goodness-of-fit on <i>F</i> <sup>2</sup>                    | 1.030                                                                                           | 1.028                                                                                           |
| <i>R</i> <sub><i>I</i></sub> , [ <i>I</i> ≥ 2σ( <i>I</i> )] | 0.0835                                                                                          | 0.0623                                                                                          |
| <i>wR</i> <sub>2</sub> , [ <i>I</i> ≥ 2σ( <i>I</i> )]       | 0.2350                                                                                          | 0.1674                                                                                          |

$$R_I = \Sigma ||F_o| - |F_c|| / \Sigma |F_o|; wR_2 = \{\Sigma [w(F_o^2 - F_c^2)^2] / \Sigma [w(F_o^2)^2]\}^{1/2}.$$

**Table S3.** Selected distances (Å) and angles (°) for **1** at different temperature.

| Compound <b>1</b>   | 273 K     | 110 K     |                                      | 273 K   | 110 K   |
|---------------------|-----------|-----------|--------------------------------------|---------|---------|
| Bond length ( Å)    |           |           | Bond angle (°)                       |         |         |
| Co1–N1 <sup>1</sup> | 2.153(9)  | 1.960(7)  | N2–Co1–N1                            | 89.4(4) | 90.0(3) |
| Co1–N1              | 2.153(9)  | 1.960(7)  | N2–Co1–N1 <sup>1</sup>               | 90.6(4) | 90.0(3) |
| Co1–N2 <sup>1</sup> | 2.096(10) | 1.880(7)  | N2 <sup>1</sup> –Co1–N1 <sup>1</sup> | 89.4(4) | 90.0(3) |
| Co1–N2              | 2.096(10) | 1.880(7)  | N2 <sup>1</sup> –Co1–N1              | 90.6(4) | 90.0(3) |
| Co1–N3 <sup>1</sup> | 2.095(11) | 1.885(8)  | N3 <sup>1</sup> –Co1–N2              | 91.4(4) | 90.1(3) |
| Co1–N3              | 2.095(11) | 1.885(8)  | N3–Co1–N2 <sup>1</sup>               | 91.4(4) | 90.1(3) |
| Co2–N4              | 2.141(9)  | 1.942(7)  | N3–Co1–N2                            | 88.6(4) | 89.9(3) |
| Co2–N4 <sup>3</sup> | 2.141(9)  | 1.942(7)  | N3 <sup>1</sup> –Co1–N2 <sup>1</sup> | 88.6(4) | 89.9(3) |
| Co2–N5              | 2.138(10) | 1.900(8)  | N3 <sup>1</sup> –Co1–N1 <sup>1</sup> | 91.4(4) | 91.3(3) |
| Co2–N5 <sup>3</sup> | 2.138(10) | 1.900(8)  | N3 <sup>1</sup> –Co1–N1              | 88.6(4) | 88.7(3) |
| Co2–N7              | 2.109(10) | 1.881(7)  | N3–Co1–N1                            | 91.4(4) | 91.3(3) |
| Co2–N7 <sup>4</sup> | 2.109(10) | 1.881(7)  | N3–Co1–N1 <sup>1</sup>               | 88.6(4) | 88.7(3) |
| Fe1–N22             | 1.951(8)  | 1.963(7)  | N5 <sup>3</sup> –Co2–N4 <sup>3</sup> | 90.3(4) | 90.3(3) |
| Fe1–N24             | 1.956(10) | 1.996(8)  | N5–Co2–N4                            | 90.3(4) | 90.3(3) |
| Fe1–N26             | 1.981(11) | 1.987(9)  | N5–Co2–N4 <sup>3</sup>               | 89.7(4) | 89.7(3) |
| Fe1–C2              | 1.921(13) | 1.886(9)  | N5 <sup>3</sup> –Co2–N4              | 89.7(4) | 89.7(3) |
| Fe1–C5              | 1.908(12) | 1.884(10) | N7 <sup>1</sup> –Co2–N5 <sup>3</sup> | 86.9(4) | 89.9(3) |
| Fe1–C8              | 1.876(15) | 1.866(9)  | N7 <sup>4</sup> –Co2–N5              | 86.9(4) | 89.9(3) |
| Fe2–N17             | 1.953(9)  | 1.976(7)  | N7 <sup>4</sup> –Co2–N5 <sup>3</sup> | 93.1(4) | 90.1(3) |
| Fe2–N13             | 1.941(9)  | 1.951(7)  | N7 <sup>1</sup> –Co2–N5              | 93.1(4) | 90.1(3) |
| Fe2–N15             | 1.944(9)  | 1.972(7)  | N7 <sup>1</sup> –Co2–N4              | 90.9(4) | 91.8(3) |
| Fe2–C3              | 1.930(13) | 1.884(9)  | N7 <sup>1</sup> –Co2–N4 <sup>3</sup> | 89.1(4) | 88.2(3) |
| Fe2–C6              | 1.908(15) | 1.896(10) | N7 <sup>4</sup> –Co2–N4              | 89.1(4) | 88.2(3) |
| Fe2–C7              | 1.907(12) | 1.906(8)  | N7 <sup>4</sup> –Co2–N4 <sup>3</sup> | 90.9(4) | 91.8(3) |

Symmetry transformations used to generate equivalent atoms: <sup>1</sup>1-X, 1-Y, 1-Z; <sup>2</sup>+X, -1+Y, +Z; <sup>3</sup>1-X, 2-Y, 1-Z; <sup>4</sup>+X, 1+Y, +Z; <sup>5</sup>2-X, 1-Y, 1-Z; <sup>6</sup>-X, 2-Y, 1-Z.

**Table S4.** Selected distances (Å) and angles (°) for **2** at different temperature.

| Compound <b>2</b>   | 230 K    | 150 K    |                                      | 230 K    | 150 K      |
|---------------------|----------|----------|--------------------------------------|----------|------------|
| Bond length (Å)     |          |          | Bond angle (°)                       |          |            |
| Co1–N1              | 2.117(5) | 1.928(3) | N1–Co1–N2 <sup>1</sup>               | 178.8(2) | 179.14(16) |
| Co1–N2 <sup>1</sup> | 2.120(5) | 1.935(3) | N3–Co1–N1                            | 90.0(2)  | 89.64(15)  |
| Co1–N3              | 2.072(6) | 1.888(4) | N3–Co1–N2 <sup>1</sup>               | 89.0(2)  | 89.50(15)  |
| Co1–N4              | 2.107(6) | 1.890(4) | N3–Co1–N4                            | 88.0(2)  | 90.12(16)  |
| Co1–N6 <sup>2</sup> | 2.082(6) | 1.891(4) | N3–Co1–N6 <sup>2</sup>               | 178.8(2) | 179.42(15) |
| Co1–N8 <sup>3</sup> | 2.108(6) | 1.892(4) | N3–Co1–N8 <sup>3</sup>               | 92.5(2)  | 90.16(16)  |
| Fe1–N20             | 1.970(6) | 1.993(4) | N4–Co1–N1                            | 92.5(2)  | 91.26(15)  |
| Fe1–N22             | 1.997(6) | 2.010(4) | N4–Co1–N2 <sup>1</sup>               | 88.2(2)  | 88.83(15)  |
| Fe1–N24             | 1.986(6) | 1.996(4) | N4–Co1–N8 <sup>3</sup>               | 179.5(2) | 89.88(16)  |
| Fe1–C4              | 1.910(7) | 1.868(4) | N6 <sup>2</sup> –Co1–N1              | 91.0(2)  | 179.64(17) |
| Fe1–C5              | 1.909(8) | 1.908(5) | N6 <sup>2</sup> –Co1–N2 <sup>1</sup> | 90.0(2)  | 90.93(15)  |
| Fe1–C8              | 1.912(7) | 1.878(4) | N6 <sup>2</sup> –Co1–N4              | 91.3(2)  | 89.93(15)  |
| Fe2–N13             | 1.965(6) | 1.959(4) | N6 <sup>2</sup> –Co1–N8 <sup>3</sup> | 88.3(2)  | 89.85(16)  |
| Fe2–N16             | 1.967(6) | 1.976(4) | N8 <sup>3</sup> –Co1–N1              | 87.2(2)  | 88.50(15)  |
| Fe2–N17             | 1.969(6) | 1.974(4) | N8 <sup>3</sup> –Co1–N2 <sup>1</sup> | 92.1(2)  | 91.42(15)  |
| Fe2–C3              | 1.896(7) | 1.907(4) | ---                                  | ---      | ---        |
| Fe2–C6              | 1.899(7) | 1.913(4) | ---                                  | ---      | ---        |
| Fe2–C7              | 1.915(7) | 1.916(5) | ---                                  | ---      | ---        |

Symmetry transformations used to generate equivalent atoms: <sup>1</sup>-1+X, +Y, +Z; <sup>2</sup>1/2-X, -1/2+Y, 3/2-Z; <sup>3</sup>1/2-X, 1/2+Y, 3/2-Z; <sup>4</sup>1+X, +Y, +Z.

**Table S5.** Temperature-dependent  $^{57}\text{Fe}$  Mössbauer parameters for **1** and **2**.

|          | T (K) | $\delta$ (mm s $^{-1}$ ) | $\Delta E_Q$ (mm s $^{-1}$ ) | Relative area (%) | Approximation ratio | Fe type                         |
|----------|-------|--------------------------|------------------------------|-------------------|---------------------|---------------------------------|
| <b>1</b> | 290 K | -0.10                    | 0.90                         | 100               | ---                 | Fe <sup>III</sup> <sub>LS</sub> |
|          | 80 K  | 0.08                     | 0.45                         | 49.18             | 1                   | Fe <sup>I</sup> <sub>LS</sub>   |
|          |       | -0.06                    | 1.42                         | 50.82             | 1                   | Fe <sup>III</sup> <sub>LS</sub> |
| <b>2</b> | 240 K | -0.02                    | 0.98                         | 100               | ---                 | Fe <sup>III</sup> <sub>LS</sub> |
|          | 75 K  | 0.15                     | 0.52                         | 48.76             | 1                   | Fe <sup>I</sup> <sub>LS</sub>   |
|          |       | 0.02                     | 1.23                         | 51.24             | 1                   | Fe <sup>III</sup> <sub>LS</sub> |

**Table S6.** Selected **distances** (Å) in compounds **1** and **2**.

| T<br>(K) | Co <sup>II</sup> ...Co <sup>II</sup> intrachain | Co <sup>II</sup> ...Co <sup>II</sup> interchain | hydrogen bonding | $\pi$ ... $\pi$ interaction |                    |
|----------|-------------------------------------------------|-------------------------------------------------|------------------|-----------------------------|--------------------|
| <b>1</b> | 273                                             | 7.069(9)                                        | 12.141(2)        | 2.86(2), 2.96(3)            | 3.605(9)           |
|          | 110                                             | 6.868(2)                                        | 11.714(3)        | 2.816(16), 2.93(2)          | 3.601(5)           |
| <b>2</b> | 230                                             | 7.054(5)                                        | 12.076(2)        | 2.760(15), 2.894(1)         | 3.673(4), 3.916(4) |
|          | 150                                             | 6.924(4)                                        | 11.723(6)        | 2.745(9), 2.875(8)          | 3.639(3), 3.886(3) |



**Table S7.** Comparison of energy barrier data in photo-induced [FeCo]-based nanomagnets.

| Complex                                                                                                                                                        | $H_{dc}$ (Oe) | $\Delta E/k_B$<br>(K) | Coercive field<br>(Oe) | Ref.      |
|----------------------------------------------------------------------------------------------------------------------------------------------------------------|---------------|-----------------------|------------------------|-----------|
| {[Fe( <sup>pz</sup> Tp)(CN) <sub>3</sub> ] <sub>2</sub> Co(4-styrylpyridine) <sub>2</sub> }<br>·2H <sub>2</sub> O·2CH <sub>3</sub> OH                          | 0             | 27                    | ---                    | S1        |
| {[Fe(bpy)(CN) <sub>4</sub> ] <sub>2</sub> Co(4,4'-bipyridine)}·4H <sub>2</sub> O                                                                               | 0             | 29                    | ---                    | S2        |
| [Co((R)-pabn)][Fe(Tp)(CN) <sub>3</sub> ](BF <sub>4</sub> )·H <sub>2</sub> O                                                                                    | 0             | 66                    | ---                    | S3        |
| [Co <sub>2</sub> Fe <sub>4</sub> (bimpy) <sub>2</sub> (CN) <sub>6</sub> (μ-CN) <sub>6</sub> ( <sup>pz</sup> Tp) <sub>4</sub> ]<br>·2(1-PrOH)·4H <sub>2</sub> O | 500           | 26                    | ---                    | S4        |
| {[Fe(bpy)(CN) <sub>4</sub> ] <sub>2</sub> Co(phpy) <sub>2</sub> }·2H <sub>2</sub> O                                                                            | 0             | 40                    | ---                    | S5        |
| {[Fe(Tp)(CN) <sub>3</sub> ] <sub>2</sub> (Co(dpa) <sub>2</sub> )}·2H <sub>2</sub> O                                                                            | 2000          | ---                   | ---                    | S6        |
| {[Fe(Tp)(CN) <sub>3</sub> ] <sub>2</sub> Co(BIT)}·2CH <sub>3</sub> OH                                                                                          | 0             | 43                    | 50                     | S7        |
| {[( <sup>pz</sup> Tp)Fe(CN) <sub>3</sub> ] <sub>2</sub> Co(L) <sub>2</sub> }·4H <sub>2</sub> O                                                                 | 0             | 81                    | 400                    | this work |

**Table S8.** Selected Angles (°) in compounds **1** and **2**.

|           | <b>1</b> |           | <b>2</b> |
|-----------|----------|-----------|----------|
|           | 273 K    |           | 230 K    |
| Co1–N3–C3 | 155.9(2) | Co1–N4–C4 | 155.5(5) |
| Co1–N2–C2 | 176.5(9) | Co1–N3–C3 | 175.2(5) |
| Co2–N7–C7 | 156.2(9) | Co1–N8–C8 | 161.5(5) |
| Co2–N5–C5 | 175.3(9) | Co1–N4–C4 | 171.4(5) |

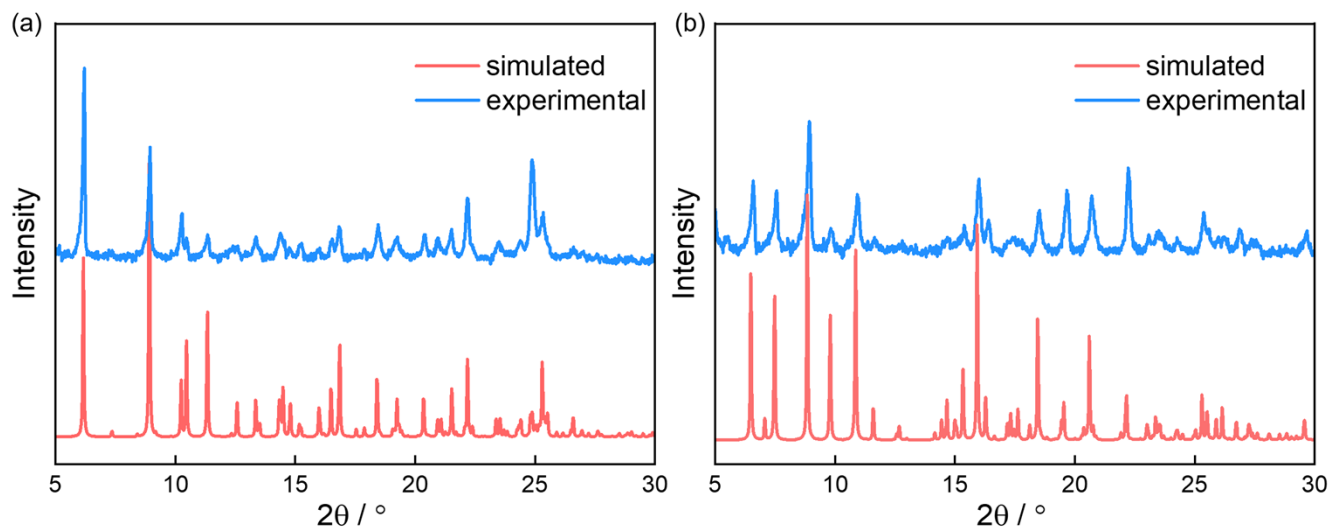

**Fig. S1.** X-ray powder diffraction data for compounds **1** (a) and **2** (b) at 300 K.

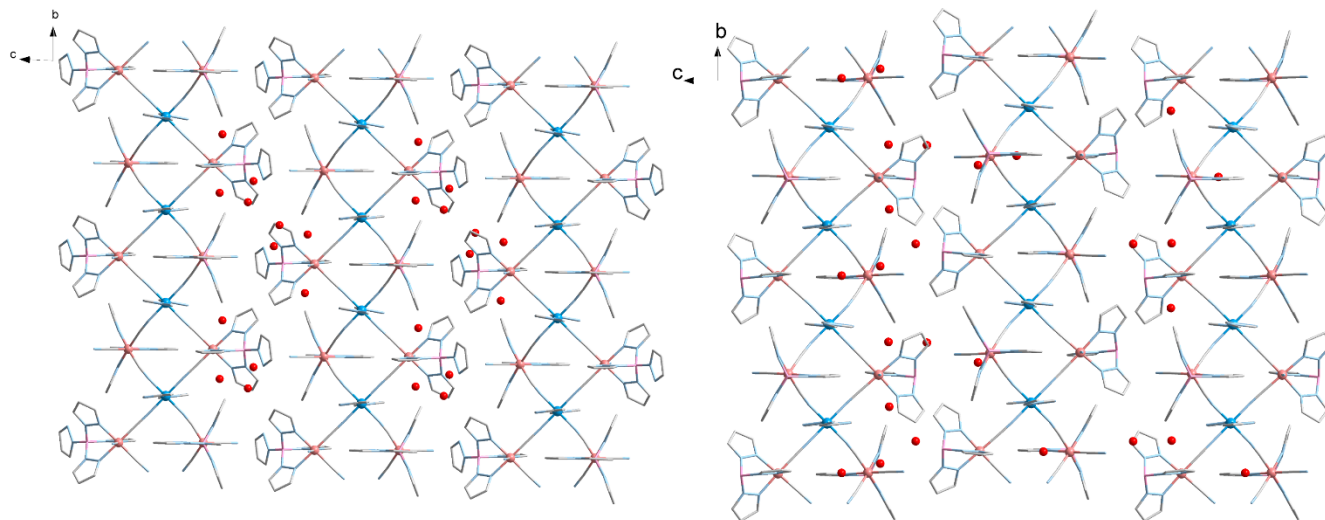

**Fig. S2.** Packing diagrams of **1** (left) and **2** (right) along *a* axis. Color code: Co<sup>II</sup>, blue; Fe<sup>III</sup>, red; B, violet; C, grey; N, pale blue; O, red. Hydrogen atoms were omitted for clarity.

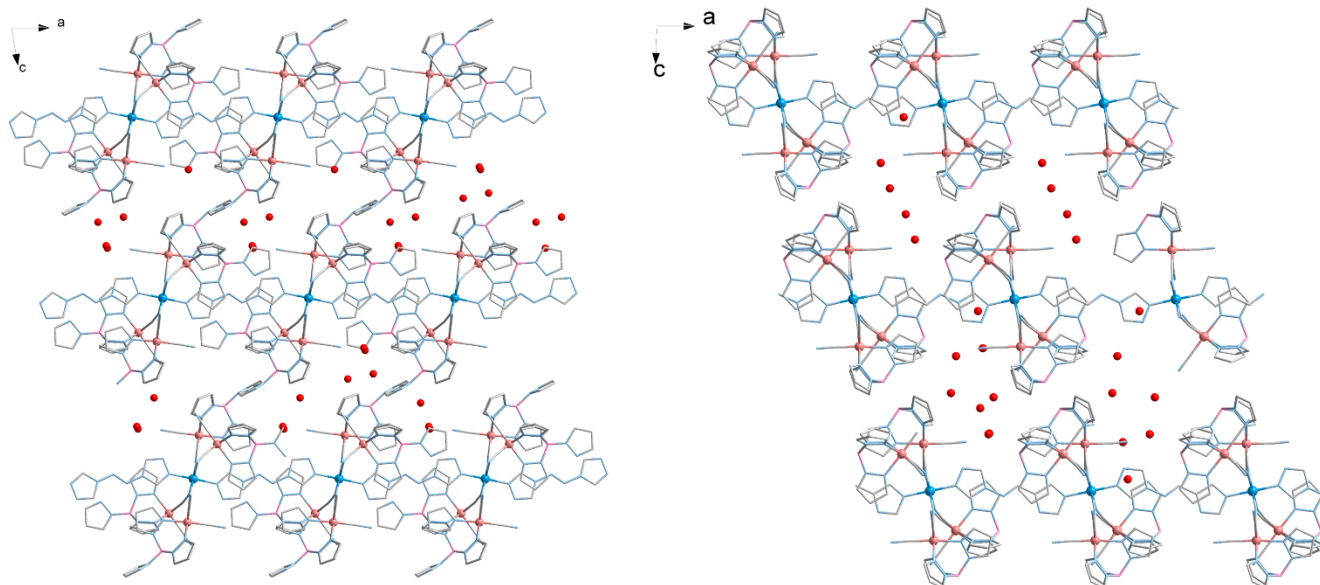

**Fig. S3.** Packing diagrams of **1** (left) and **2** (right) along *b* axis. Color code: Co<sup>II</sup>, blue; Fe<sup>III</sup>, red; B, violet; C, grey; N, pale blue; O, red. Hydrogen atoms were omitted for clarity.

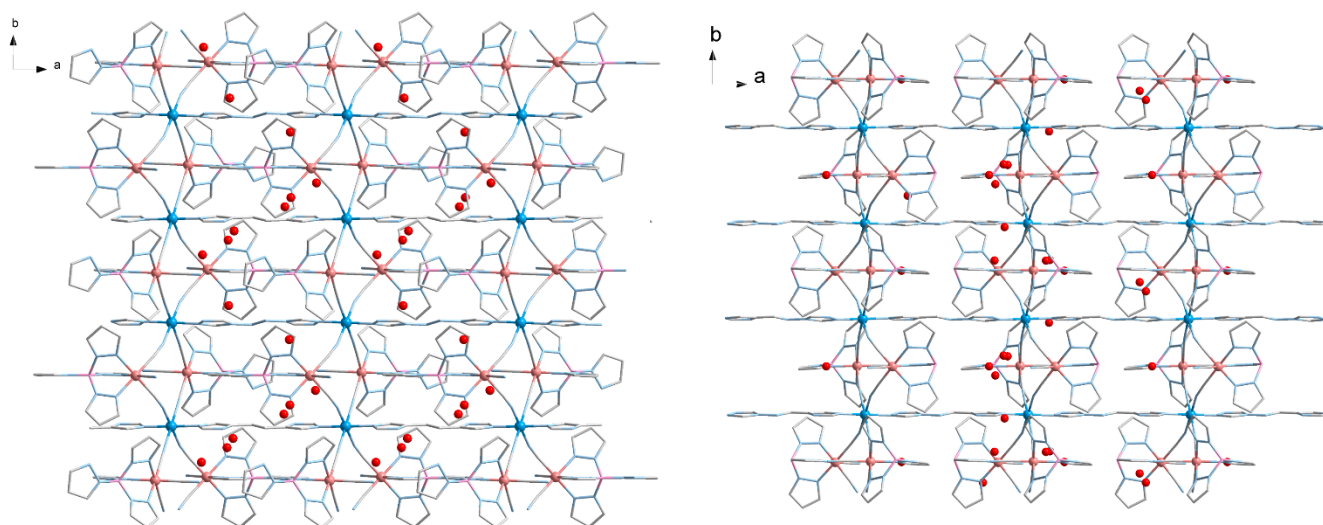

**Fig. S4.** Packing diagrams of **1** (left) and **2** (right) along *c* axis. Color code: Co<sup>II</sup>, blue; Fe<sup>III</sup>, red; B, violet; C, grey; N, pale blue; O, red. Hydrogen atoms were omitted for clarity.

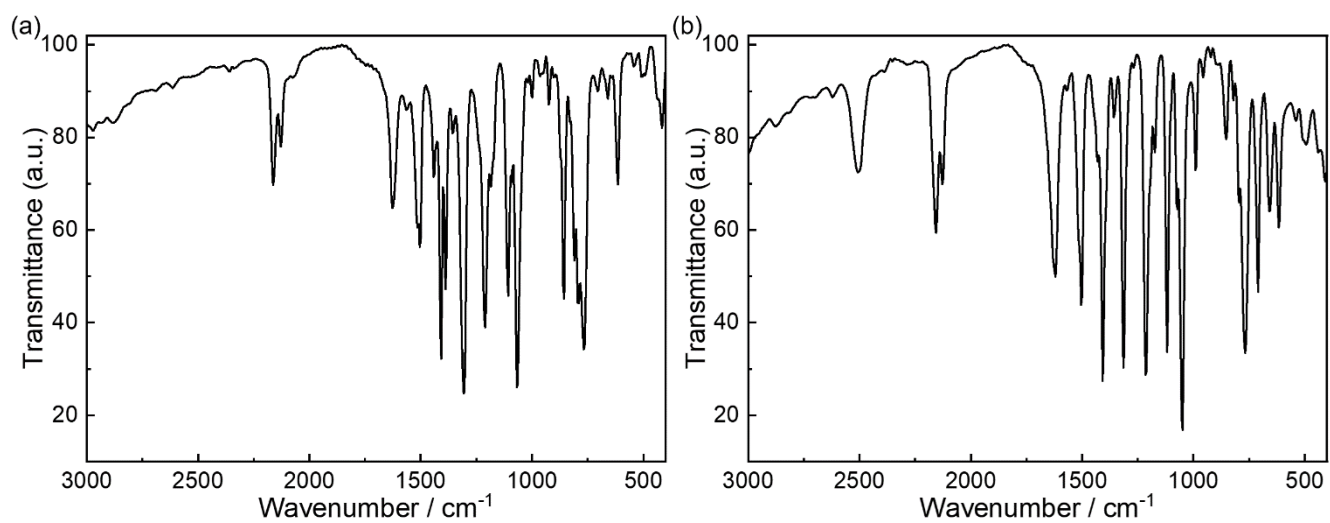

**Fig. S5.** IR spectra of **1** (a) and **2** (b) at 300 K.

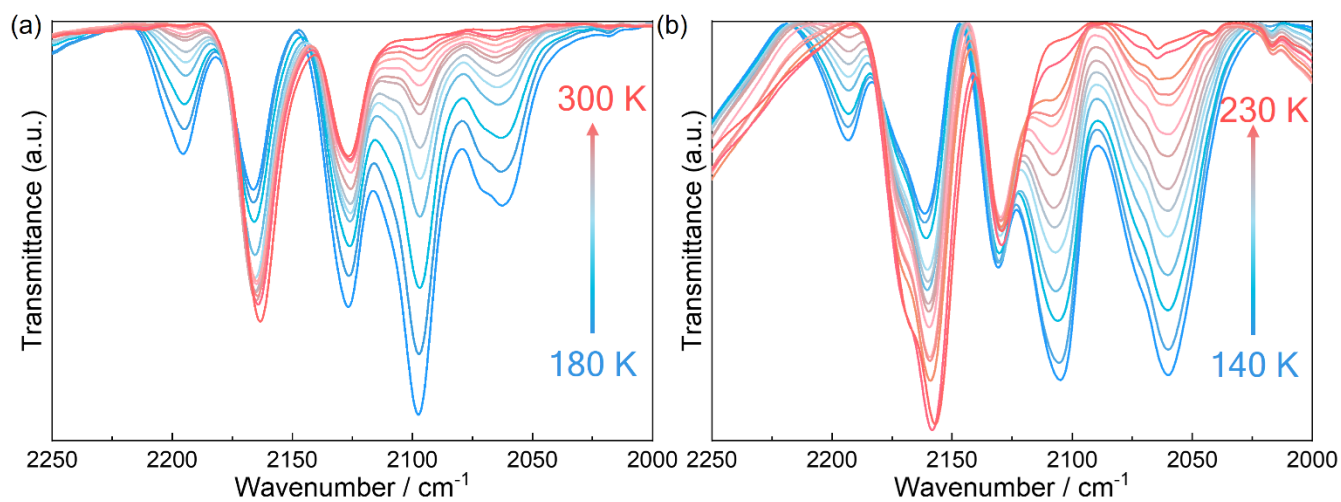

**Fig. S6.** Temperature-dependent infrared spectra in heating mode (from blue to red) for compounds **1** (a) and **2** (b).



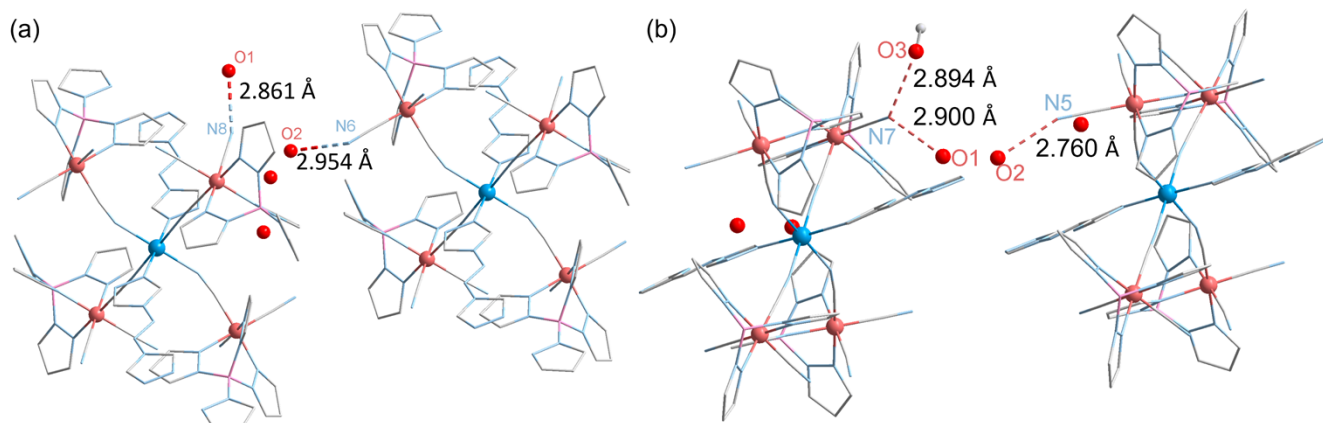

**Fig. S7.** Hydrogen bonds formed between lattice water molecules and terminal cyanide nitrogen atoms for **1** (a) at 273 K and **2** (b) at 230 K, respectively. Hydrogen atoms have been omitted for clarity.

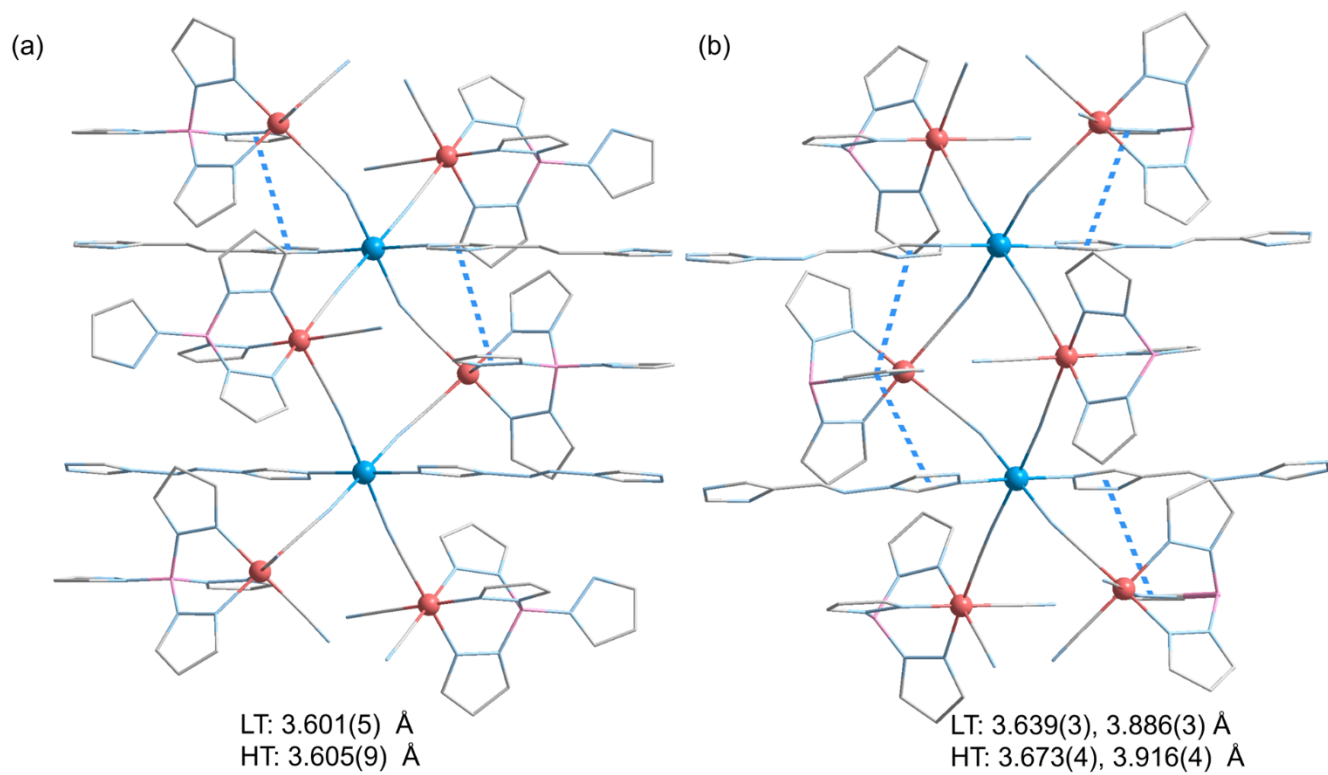

**Fig. S8.**  $\pi \cdots \pi$  distances formed between ligand L and cyanometallate building blocks for **1** (a) and **2** (b) at LT and HT phases, respectively. Hydrogen atoms have been omitted for clarity.

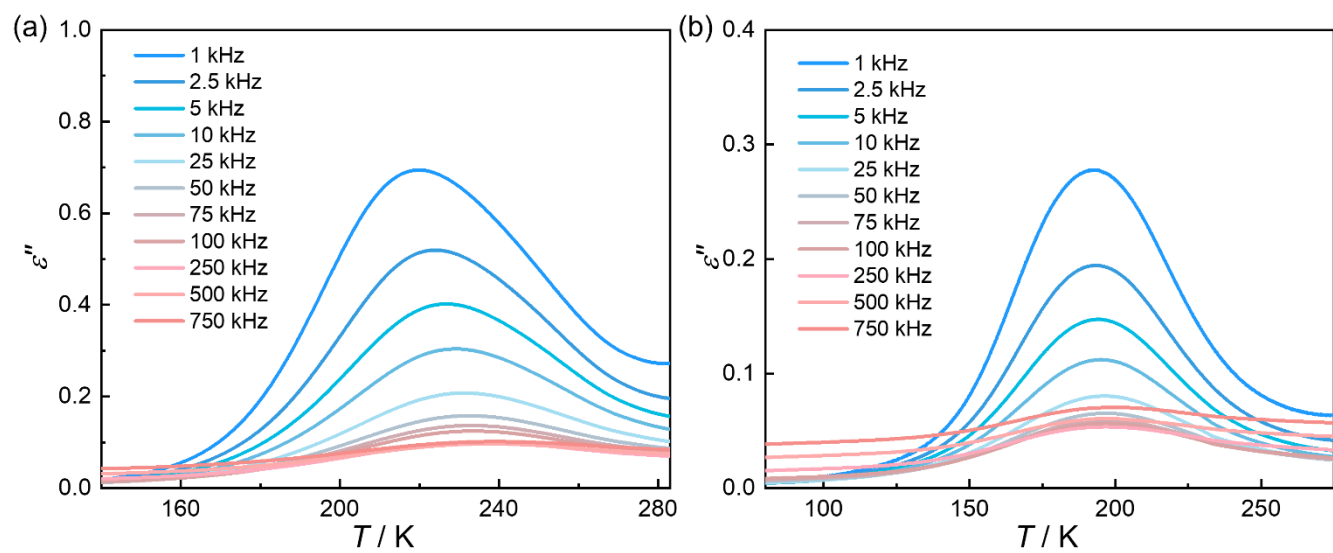

**Fig. S9.** Temperature-dependence dielectric loss ( $\epsilon''$ ) signals of compounds **1** (a) and **2** (b) with different frequencies.

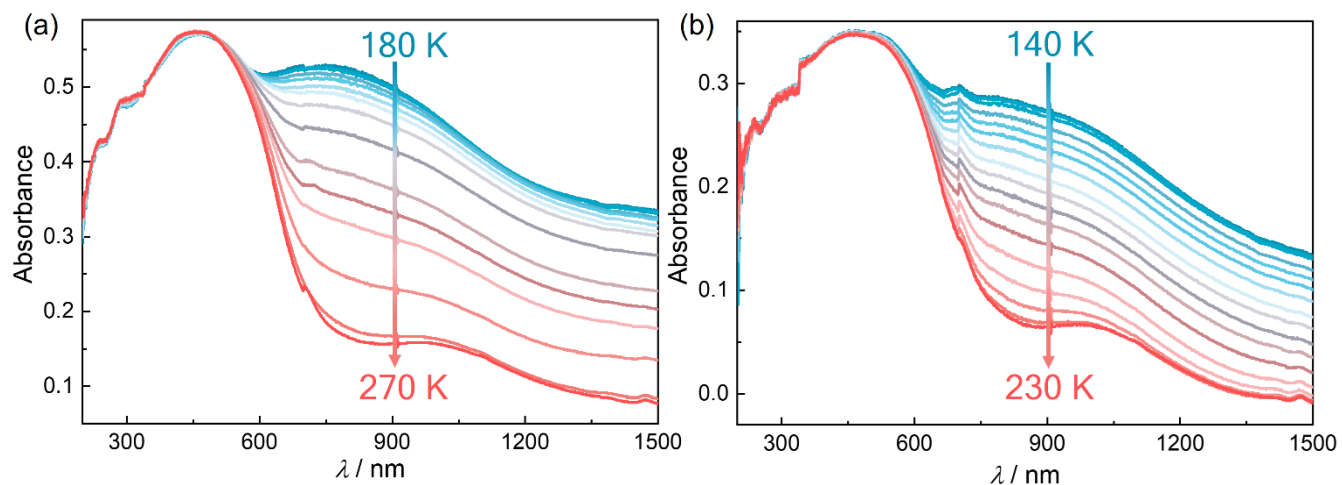

**Fig. S10.** Variable temperature solid state UV-Vis-NIR spectra in heating mode (from blue to red) for compounds **1** (a) and **2** (b).

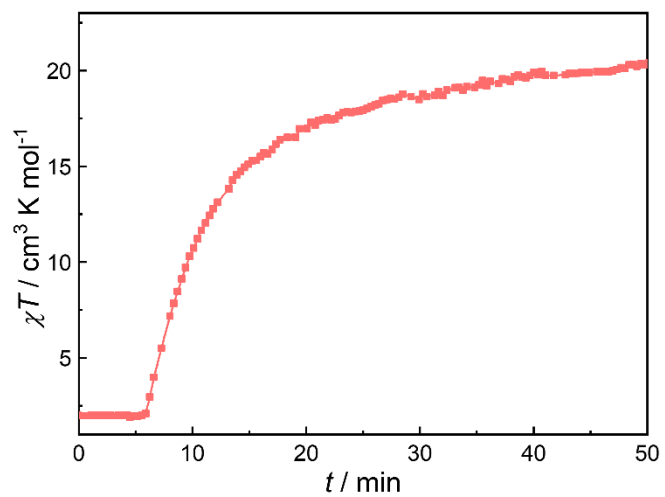

**Fig. S11.**  $\chi T$  vs time plots of **1** under successive 946-nm light irradiation at 10 K.

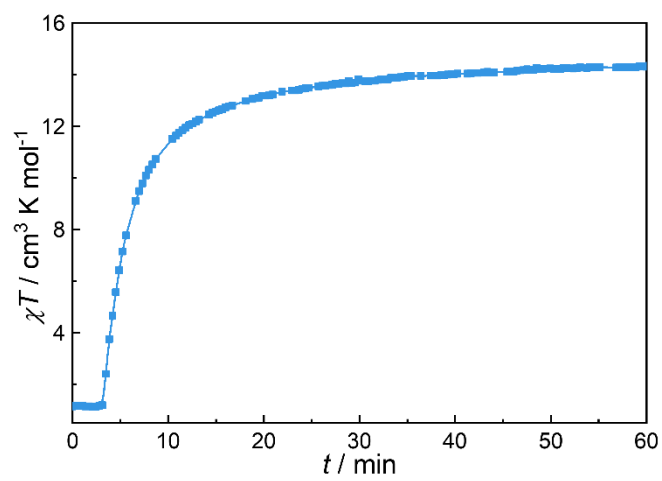

**Fig. S12.**  $\chi T$  vs time plots of **2** under successive 946-nm light irradiation at 10 K.

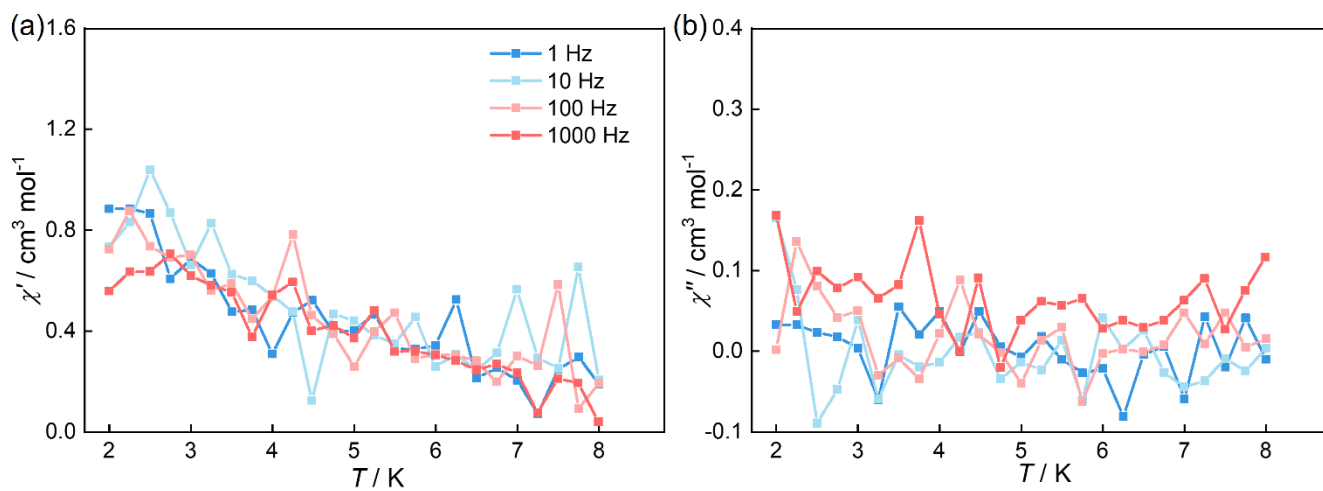

**Fig. S13.** Temperature dependence of in-phase ( $\chi'$ ) and out-of-phase ( $\chi''$ ) signals for **1** before irradiation under zero DC field and 3.5 Oe AC field.

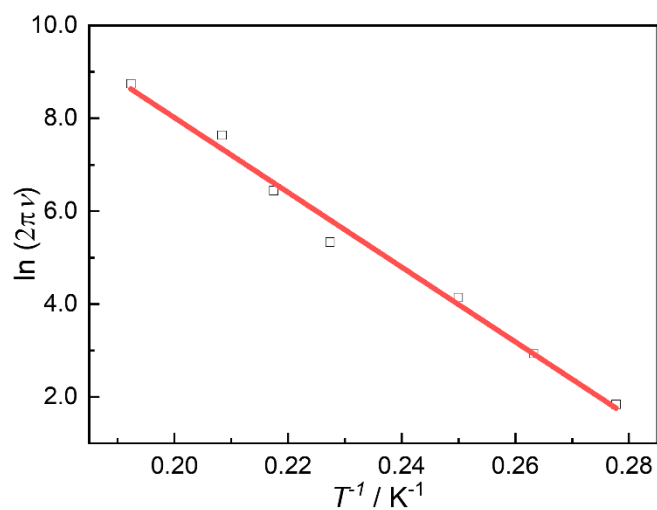

**Fig. S14.**  $\ln(2\pi f)$  vs.  $T^{-1}$  plots for **1** after 946-nm light irradiation. The relaxation times  $\tau = (2\pi f)^{-1}$  were determined from AC measurement. The solid line represented the least-squares fitting by applying the Arrhenius Law  $\ln(2\pi f) = \ln\tau_0^{-1} + \Delta E/(k_B T)$ . The energy barrier  $\Delta E/k_B$  was 81 K and pre-exponential factor  $\tau_0$  was  $3.3(4) \times 10^{-11}$  s.



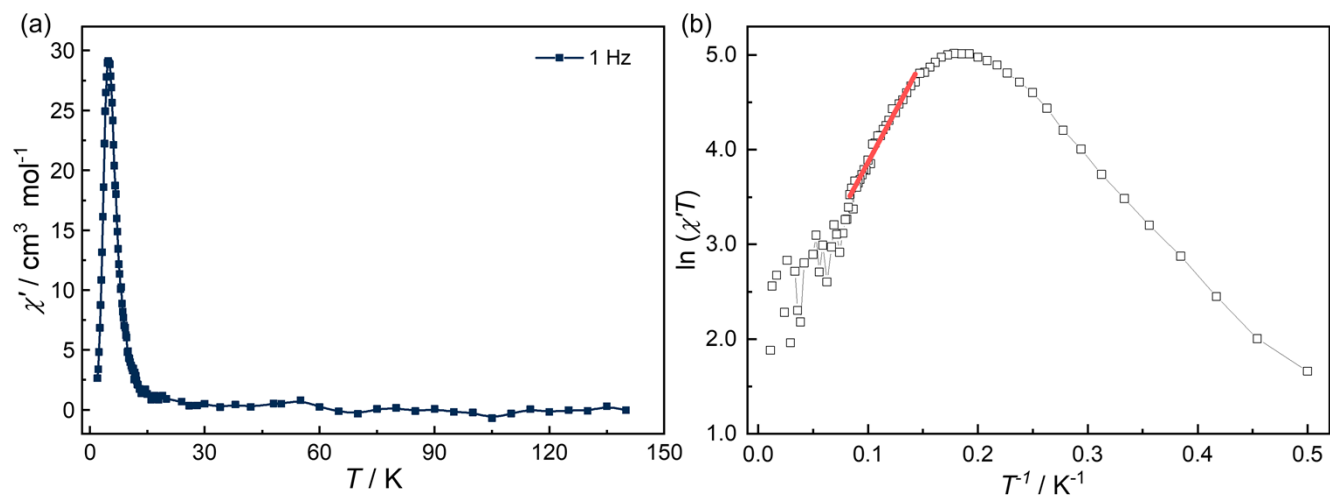

**Fig. S15.** (a) Temperature dependence of the in-phase of ac magnetic susceptibility of **1** after 946-nm irradiation under zero DC field at 1 Hz. (b) Plot of  $\ln(\chi'T)$  versus  $T^{-1}$  for **1** after 946-nm irradiation. The red line represented the fitting by applying equation  $\chi'T = C_{\text{eff}} \exp(\Delta\zeta/k_B T)$ .

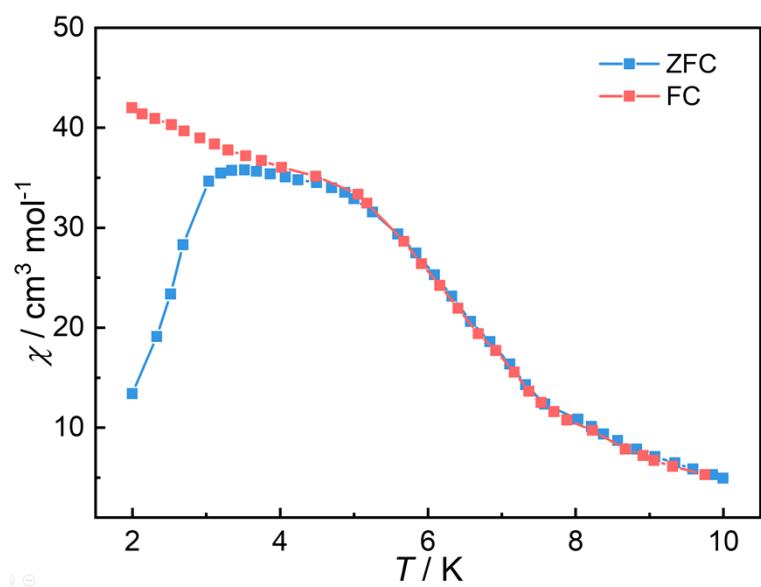

**Fig. S16.** Zero-field-cooling and field-cooling susceptibility measurement for **1** under 50 Oe DC field after 946-nm light irradiation.

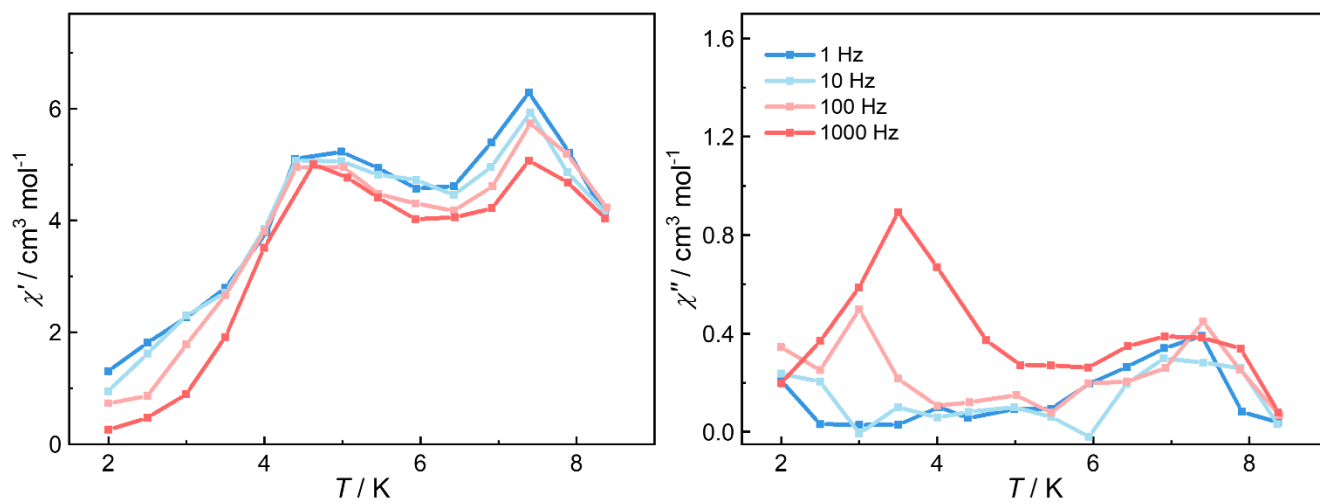

**Fig. S17.** Temperature dependence of in-phase ( $\chi'$ ) and out-of-phase ( $\chi''$ ) signals for **2** after irradiation under zero DC field and 3.5 Oe AC field.

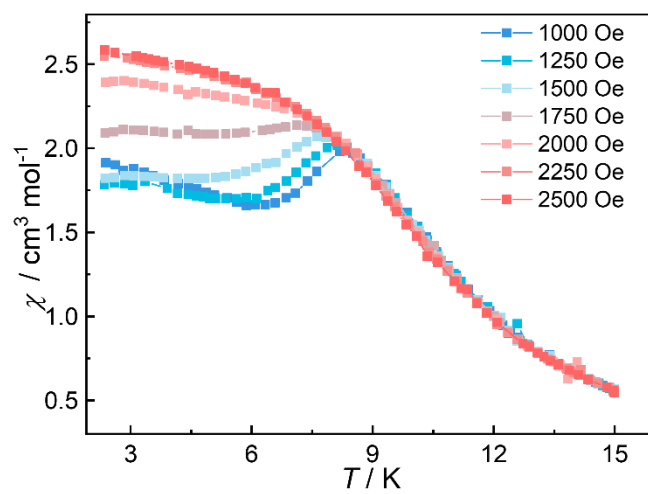

**Fig. S18.** Susceptibility measurements of compound **2** under different dc fields after light irradiation.

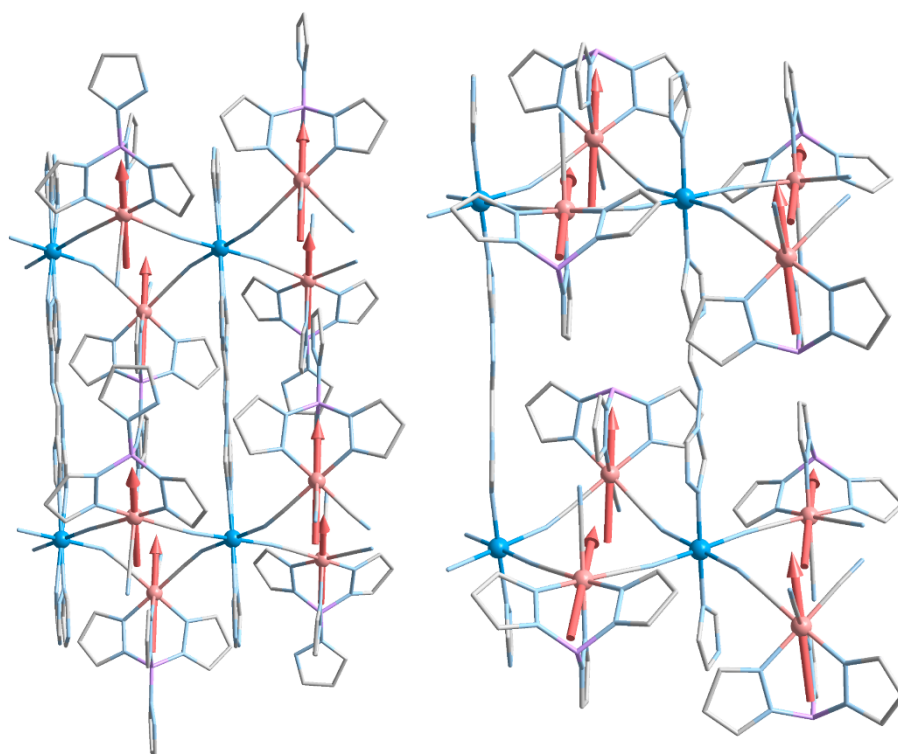

**Fig. S19.** View of twisted iron cores present in **1** (left) and **2** (right) along the pseudo- $C_3$  axes (along the B...Fe vectors).

## Reference

- [S1] D. P. Dong, T. Liu, S. Kanegawa, S. Kang, O. Sato, C. He and C. Y. Duan, Photoswitchable dynamic magnetic relaxation in a well-isolated  $\{\text{Fe}_2\text{Co}\}$  double-zigzag chain, *Angew. Chem. Int. Ed.*, 2012, **51**, 5119-5123.
- [S2] T. Liu, Y. J. Zhang, S. Kanegawa and O. Sato, Photoinduced Metal-to-Metal Charge Transfer toward Single-Chain Magnet, *J. Am. Chem. Soc.*, 2010, **132**, 8250-8251.
- [S3] N. Hoshino, F. Iijima, G. N. Newton, N. Yoshida, T. Shiga, H. Nojiri, A. Nakao, R. Kumai, Y. Murakami and H. Oshio, Three-way switching in a cyanide-bridged  $[\text{CoFe}]$  chain, *Nat. Chem.*, 2012, **4**, 921-926.
- [S4] M. Nihei, Y. Okamoto, Y. Sekine, N. Hoshino, T. Shiga, I. P. Liu and H. Oshio, A light-induced phase exhibiting slow magnetic relaxation in a cyanide-bridged  $[\text{Fe}_4\text{Co}_2]$  complex, *Angew. Chem. Int. Ed.*, 2012, **51**, 6361-6364.
- [S5] W. Jiang, C. Jiao, Y. Meng, L. Zhao, Q. Liu and T. Liu, Switching single chain magnet behavior via photoinduced bidirectional metal-to-metal charge transfer, *Chem. Sci.*, 2018, **9**, 617-622.
- [S6] J. Li, S. Wu, S. Su, S. Kanegawa and O. Sato, Manipulating Slow Magnetic Relaxation by Light in a Charge Transfer  $\{\text{Fe}_2\text{Co}\}$  Complex, *Chem. Eur. J.*, 2020, **26**, 3259-3263.
- [S7] N.-T. Yao, L. Zhao, C. Yi, Q. Liu, Y.-M. Li, Y.-S. Meng, H. Oshio and T. Liu, Manipulating Selective Metal-to-Metal Electron Transfer to Achieve Multi-Phase Transitions in an Asymmetric  $\text{Fe}_2\text{Co}$ -Assembled Mixed-Valence Chain, *Angew. Chem. Int. Ed.*, 2022, DOI: 10.1002/anie.202115367.
